# Supplementary material for: Metabolic syndrome and its correlated factors in an urban population in South West of Iran
Source: PubMed Central journal article supplement (PMC3598198; doi:10.1186/2251-6581-12-11), 2013-02-08

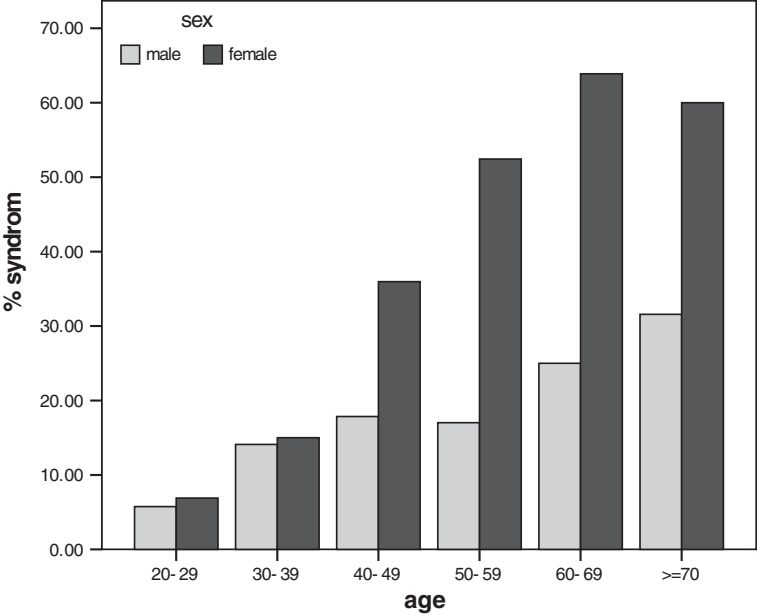

Supplement: 40200_2012_35_MOESM1_ESM.pdf [file 40200_2012_35_MOESM1_ESM.pdf]
